# Supplementary material
Source: PubMed Central journal article supplement (PMC8453298)
Supplement: awaa249_supplementary_data.pdf [file awaa249_supplementary_data.pdf]

**Supplementary Figure 1. Comparative spinal cord segmentation techniques: processing and results. (Upper panel) Processing pipeline.** Representative example of a native C1 lesion in an SPMS participant 33-year-old female (RRMS, EDSS: 1, DD: 2.3 years). Beginning with the native acquisition, then manual segmentation of the lesion mask in FSL. The native acquisition is then processed in Spinal Cord Toolbox to isolate the spinal cord. The inside-out technique begins in the central canal expanding towards the subpial surface, as described in the manuscript. Outside-in processing in SCT, begins by sequentially eroding the spinal cord mask. This was done in two iterations, conceptually the same but in difference spaces. The native space, as done in the inside-out method, and in the PAM50 atlas space, registered into a probabilistic template place of 50 healthy volunteers. **(Lower panel) Comparative spinal cord mapping results.** Box-and-whisker plots depict the lesioned fraction (y-axis) normalized to the respective radial dilation layer volume and individual MS participant lesion volume. The concentric distance (x-axis) of the three segmentation techniques from the central canal (layer 0, cyan) extending towards the outer subpial surface (layer 9, magenta) for the whole lesion fraction in all MS, RRMS and SPMS participants, respectively. Error bars represent the 95% confidence interval for the respective lesioned tissue dilation level. Bar graphs depict the Mann-Whitney U-test rank difference between the RRMS and SPMS subtypes for the respective dilation layers. *P*-values reported are exploratory, and therefore not corrected for multiple comparisons.

*Exploratory comparison of individual level lesion fraction compared to the median of the inner-most level (\**P*-value <0.05, \*\**P*-value <0.01, \*\*\**P*-value <0.001 by Wilcoxon Signed Rank test, two-tailed, equal variances not assumed).*

*Exploratory comparison of RRMS vs. SPMS participants (+*P*-value <0.05, ++*P*-value <0.01, +++*P*-value <0.001, by Mann–Whitney U-test (two-tailed, equal variances not assumed).*

*DD = Disease Duration*

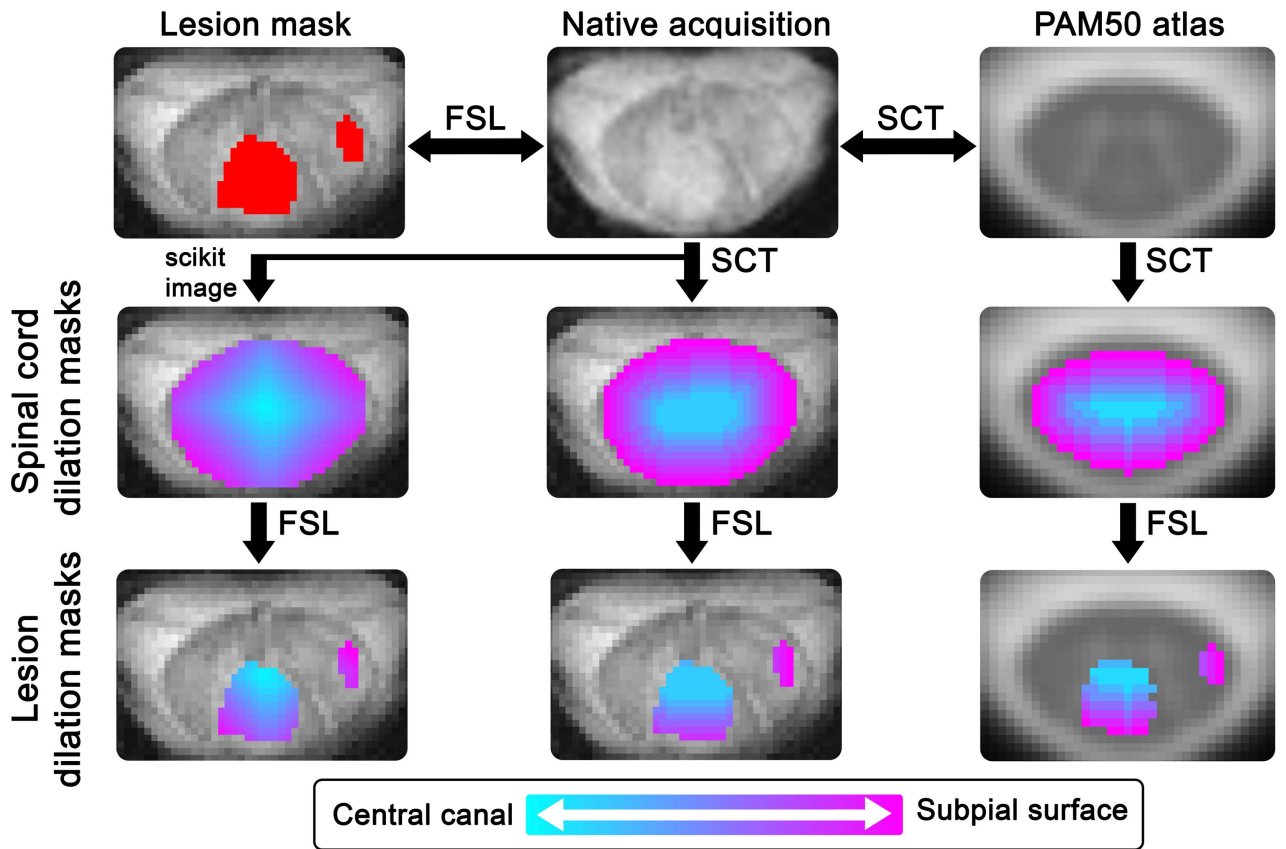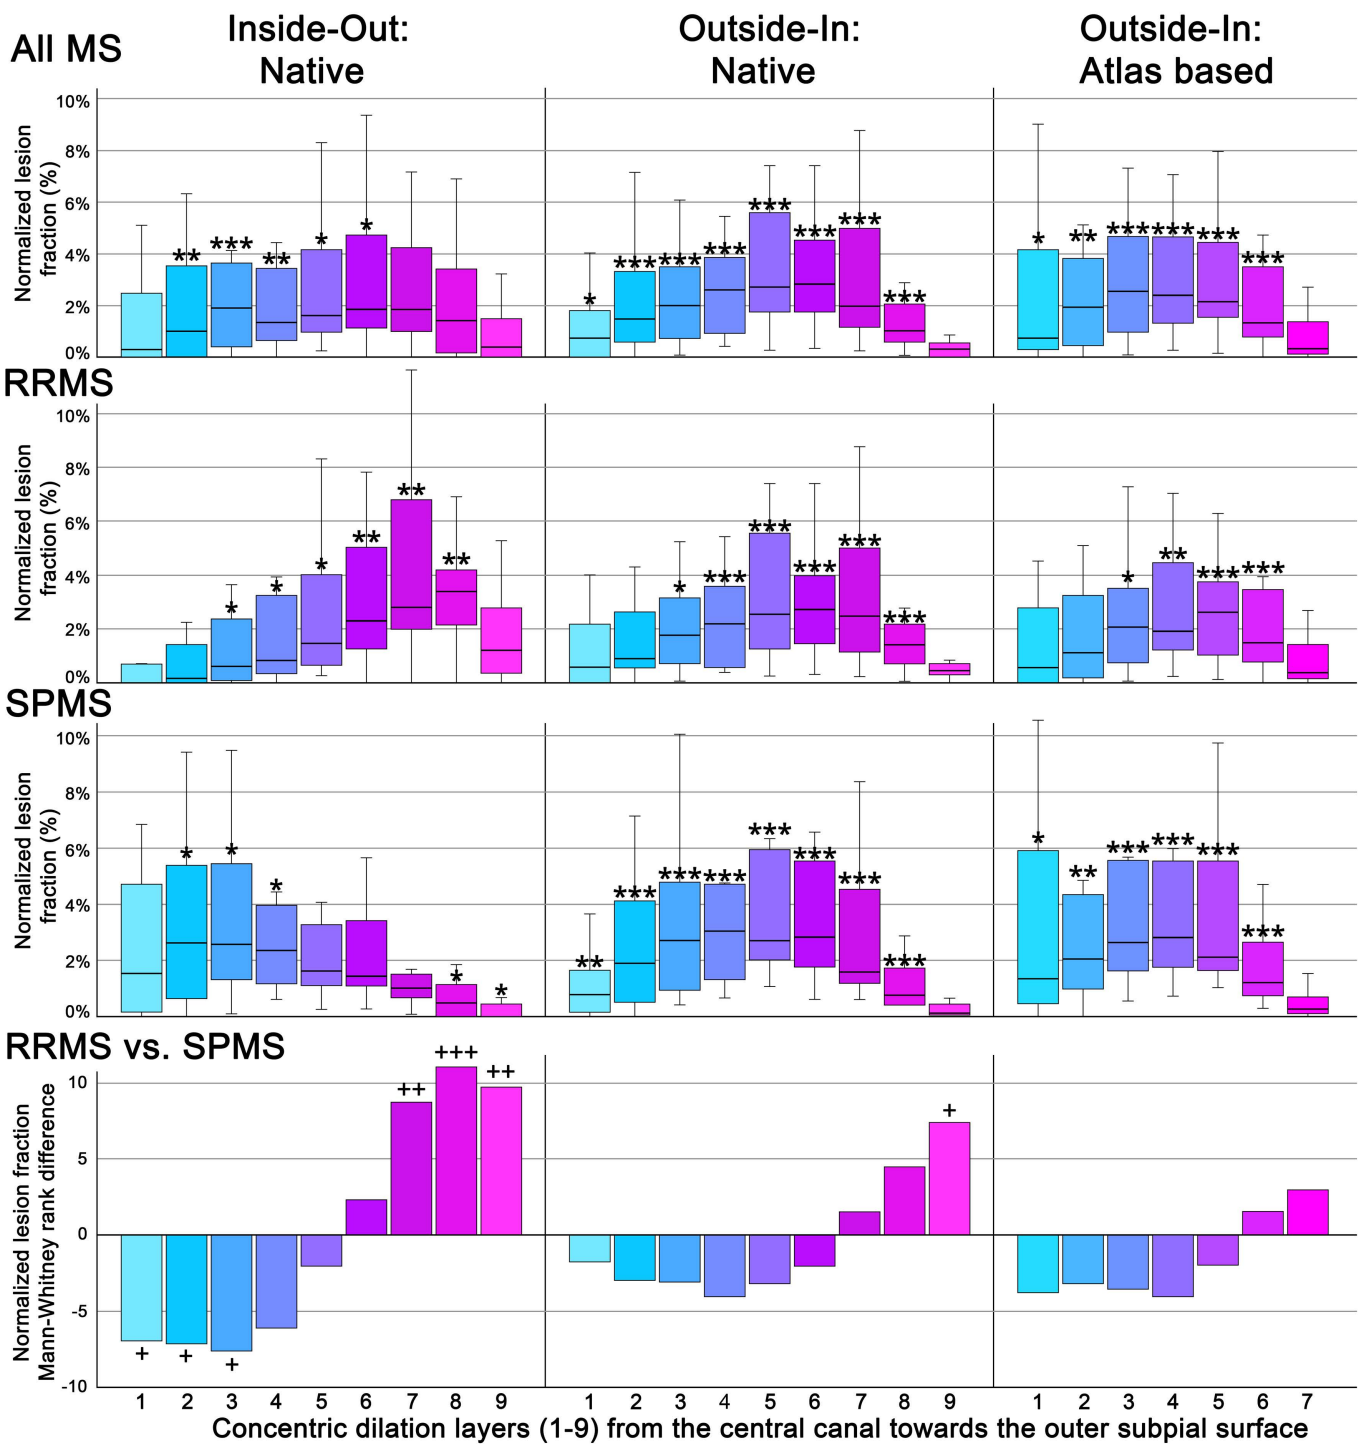

**Supplementary table 1. Brain and spinal cord MRI correlations.**

|                          |                                     | Spinal cord MRI metrics |                   |    |              |                   |    |                 |                     |    |              |                     |    |
|--------------------------|-------------------------------------|-------------------------|-------------------|----|--------------|-------------------|----|-----------------|---------------------|----|--------------|---------------------|----|
|                          |                                     | Cross-sectional area    |                   |    |              |                   |    | Lesion fraction |                     |    |              |                     |    |
|                          |                                     | Grey matter             |                   |    | White matter |                   |    | Grey matter     |                     |    | White matter |                     |    |
|                          |                                     | $r/\rho$                | $P$               | N  | $r/\rho$     | $P$               | N  | $\rho$          | $P$                 | N  | $\rho$       | $P$                 | N  |
| <b>Brain MRI metrics</b> | <b>Cortical thickness</b>           | 0.13                    | 0.46 <sup>†</sup> | 34 | 0.17         | 0.35 <sup>†</sup> | 34 | 0.03            | 0.86 <sup>‡</sup>   | 34 | -0.05        | 0.78 <sup>‡</sup>   | 34 |
|                          | <b>Cortical lesion volume</b>       | -0.27                   | 0.16 <sup>‡</sup> | 29 | -0.26        | 0.18 <sup>‡</sup> | 29 | 0.19            | 0.33 <sup>‡</sup>   | 29 | 0.30         | 0.12 <sup>‡</sup>   | 29 |
|                          | <b>White matter lesion fraction</b> | -0.27                   | 0.13 <sup>‡</sup> | 34 | -0.27        | 0.13 <sup>‡</sup> | 34 | 0.39            | 0.021 <sup>‡*</sup> | 34 | 0.37         | 0.033 <sup>‡*</sup> | 34 |

<sup>†</sup>*P*-value by Spearman's rank-order correlation (two-tailed).

<sup>‡</sup>*P*-value by Pearson correlation coefficient (two-tailed).

\*Statistically significant.

**Supplementary table 2. Clinical correlations with spinal cord and brain MRI metrics.**

|                    |                              | EDSS   |          |      | 9 - HPT |                    |      | T25-FW |          |    |
|--------------------|------------------------------|--------|----------|------|---------|--------------------|------|--------|----------|----|
|                    |                              | $\rho$ | <i>P</i> | N    | $\rho$  | <i>P</i>           | N    | $\rho$ | <i>P</i> | N  |
| <b>Spinal cord</b> | Cross-sectional area:        |        |          |      |         |                    |      |        |          |    |
|                    | Grey matter                  | -0.31  | 0.069    | 35   | -0.47   | 0.007*             | 32   | -0.27  | 0.12     | 34 |
|                    | White matter                 | -0.29  | 0.087    | 35   | -0.45   | 0.009*             | 32   | -0.29  | 0.088    | 34 |
|                    | Lesion fraction:             |        |          |      |         |                    |      |        |          |    |
| Grey matter        | 0.21                         | 0.23   | 35       | 0.21 | 0.24    | 32                 | 0.16 | 0.37   | 34       |    |
| White matter       | 0.33                         | 0.056  | 35       | 0.31 | 0.09    | 32                 | 0.17 | 0.33   | 34       |    |
| <b>Brain</b>       | Cortical Thickness           | -0.56  | 0.001*   | 34   | -0.44   | 0.013 <sup>‡</sup> | 31   | -0.43  | 0.012*   | 33 |
|                    | Cortical lesion fraction     | 0.42   | 0.025*   | 29   | 0.22    | 0.28               | 26   | 0.33   | 0.089    | 28 |
|                    | White matter lesion fraction | 0.35   | 0.042*   | 34   | 0.49    | 0.005*             | 31   | 0.40   | 0.022*   | 33 |

All correlations are reported using Spearman's rank-order correlation coefficient ( $\rho$ ) for non-parametric variables.

Cortical and white matter brain lesions were normalized to the estimated total intracranial volume (eTIV) from FreeSurfer.

\*Statistically significant.

9-HPT = 9-Hole Peg Test, EDSS = Expanded Disability Status Scale, N = total number of respective participants, T25-FW = Timed 25-Foot Walk
